# Supplementary material
Source: HighWire-hosted journal article supplement (https://bjsm.bmj.com/content/55/20/1161)
Supplement: inline-supplementary-material-1 [file inline-supplementary-material-1.pdf]

| First author                  | year | n                                                                     | Mean age                                                                                                                            | % women                                         | Last follow-up                                                                  | Stem cell type                                        | Culturing | Surgical procedure                                                  | Number of intra-articular injections                    | Timing of injection                         | Control intervention |
|-------------------------------|------|-----------------------------------------------------------------------|-------------------------------------------------------------------------------------------------------------------------------------|-------------------------------------------------|---------------------------------------------------------------------------------|-------------------------------------------------------|-----------|---------------------------------------------------------------------|---------------------------------------------------------|---------------------------------------------|----------------------|
| Wong <sup>30</sup>            | 2013 | int. 28, control 28                                                   | int. median 53 (range 36 to 54), control median 49 (range 24 to 54)                                                                 | int. 53, control 50                             | int. mean 24.8 mo (range 24 to 36 mo), control mean 24.5 mo (range 24 to 35 mo) | autologous bone marrow-derived mesenchymal stem cells | yes       | arthroscopic microfracture and medial opening high tibial osteotomy | 1                                                       | median 22 days postoperatively              | HA                   |
| Koh <sup>31</sup>             | 2014 | int. 26, control 26                                                   | int. 54.2 ± 2.9, control 52.3 ± 4.9                                                                                                 | int. 76, control 74                             | mean 24.4 mo (range 24 to 25 mo)                                                | autologous adipose-derived mesenchymal stem cells     | yes       | arthroscopy and open-wedge high tibial osteotomy                    | 1                                                       | peroperatively                              | PRP                  |
| Lamo-Espinosa <sup>22,4</sup> | 2016 | int. low-dose 10, int. high-dose 10, control 12 (2 withdrawn consent) | int. low-dose median 65.9 (IQR 59.5 to 70.6), int. high-dose median 57.8 (IQR 55.0 to 60.8), control median 60.3 (IQR 55.1 to 66.1) | int. low-dose 60, int. high-dose 20, control 30 | 48 mo                                                                           | autologous bone marrow-derived mesenchymal stem cells | yes       | none                                                                | 1 MSC, directly followed by 1 injection hyaluronic acid | 3-4 weeks after harvesting from iliac crest | HA                   |

|                              |      |                                                       |                                                                               |                                                       |       |                                                                                                                   |     |                                                                   |                                                  |                                                       |                    |
|------------------------------|------|-------------------------------------------------------|-------------------------------------------------------------------------------|-------------------------------------------------------|-------|-------------------------------------------------------------------------------------------------------------------|-----|-------------------------------------------------------------------|--------------------------------------------------|-------------------------------------------------------|--------------------|
| <b>Goncars<sup>32</sup></b>  | 2017 | int. 28, control 28                                   | int. 53.4 ± 15, control 58.6 ± 13                                             | int. 46, control 64                                   | 12 mo | autologous bone marrow-derived mononuclear cells                                                                  | no  | none                                                              | int. 1, control 3 (with an interval of one week) | directly after harvesting                             | sodium hyaluronate |
| <b>Turajane<sup>33</sup></b> | 2017 | int. (with GFA) 20, int. (without GFA) 20, control 20 | int. (with GFA) 54.9 ± 6.1, int. (without GFA) 55.4 ± 2.3, control 54.7 ± 3.5 | int. (with GFA) 50, int. (without GFA) 85, control 70 | 12 mo | autologous activated peripheral blood stem cells with GFA (group 1) or without (group 2) GFA, and hyaluronic acid | no  | arthroscopic microdrilling mesenchymal cell stimulation procedure | 3 (with an interval of one week)                 | Peroperatively                                        | HA                 |
| <b>Emadedin<sup>34</sup></b> | 2018 | int. 22, control 25                                   | int. 51.7 ± 9.2, control 54.7 ± 5.3                                           | int. 36.8, control 37.5                               | 6 mo  | autologous bone marrow-derived mesenchymal stromal cells                                                          | yes | none                                                              | 1                                                | after culturing (timing unknown)                      | saline             |
| <b>Centeno<sup>35</sup></b>  | 2018 | int. 26, control 22                                   | int. 54, control 57                                                           | not reported                                          | 3 mo* | autologous bone marrow concentrate                                                                                | no  | none                                                              | 3 (pre-treatment, intervention, post-treatment)  | time between BMC procedure and injection not reported | exercise           |
| <b>Lee<sup>36</sup></b>      | 2018 | int. 12, control 12                                   | int. 62.2 ± 6.5, control 63.2 ± 4.2                                           | int. 75, control 75                                   | 6 mo  | autologous adipose tissue-derived mesenchymal stem cells                                                          | yes | none                                                              | 1                                                | Not reported                                          | saline             |
| <b>Bastos<sup>25</sup></b>   | 2020 | int. MSC 16, int. MSC+PRP 14,                         | int. MSC 55.7 ± 7.8, int. MSC+PRP                                             | int. MSC 37.5, int. MSC+PRP                           | 12 mo | autologous bone marrow stromal                                                                                    | yes | none                                                              | 1                                                | 2 to 3 weeks after bone                               | corticosteroid     |

|                                   |      |                                                       |                                                                                         |                                                       |                                                                            |                                                                     |     |                                  |                                                                |                                                    |                     |
|-----------------------------------|------|-------------------------------------------------------|-----------------------------------------------------------------------------------------|-------------------------------------------------------|----------------------------------------------------------------------------|---------------------------------------------------------------------|-----|----------------------------------|----------------------------------------------------------------|----------------------------------------------------|---------------------|
|                                   |      | control 17                                            | 60.8 ± 9.9, control 55.9 ± 13.4                                                         | 64.3, control 47.1                                    |                                                                            | mesenchymal stem cells                                              |     |                                  |                                                                | marrow aspiration                                  |                     |
| <b>Freitag<sup>37</sup></b>       | 2019 | int. 1 injection 10, int. 2 injections 10, control 10 | int. 1 injection 54.6 (SD 6.3), int. 2 injections 54.7 (SD 10.2), control 51.5 (SD 6.1) | int. 1 injection 30, int. 2 injections 60, control 50 | 12 mo                                                                      | autologous adipose derived mesenchymal stem cells                   | yes | none                             | 1 or 2 (baseline and at 6 months)                              | time between harvesting and injection not reported | saline              |
| <b>Lu<sup>26</sup></b>            | 2019 | int. 26, control 26                                   | int. 55.0 (SD 9.2), control 59.6 (SD 6.0)                                               | int. 88.5, control 88.5                               | 12 mo                                                                      | autologous mesenchymal progenitor cells derived from adipose tissue | yes | none                             | int. 2 with mesenchymal progenitor cells and 2 sham, control 4 | 1 week between injections                          | HA                  |
| <b>Lamo-Espinosa<sup>38</sup></b> | 2020 | int. 24, control 26                                   | int. 56 (range 40-62), control 54.6 (range 33-70)                                       | int. 83, control 84                                   | 12 mo                                                                      | autologous bone marrow-derived mesenchymal stem cells               | yes | none                             | int. 3 (1 MSC+PRP and 2 single PRP), control 3 (all PRP)       | 1 week between injections                          | PRP                 |
| <b>Kim<sup>39</sup></b>           | 2020 | int. MSC 36, int. MSC+allogenic cartilage 34          | int. MSC 55.6 (SD 2.9), int. MSC+allogenic cartilage 56.1 (SD 3.6)                      | int. MSC 58, int. MSC+allogenic cartilage 59          | Mean int. MSC 27.3 mo (SD 3.3), int. MSC+allogenic cartilage 27.8 (SD 3.9) | autologous adipose derived mesenchymal stem cells                   | yes | open-wedge high tibial osteotomy | 1                                                              | peroperatively                                     | Allogenic cartilage |

|                   |      |                     |                                             |                     |       |                                             |    |      |   |                           |     |
|-------------------|------|---------------------|---------------------------------------------|---------------------|-------|---------------------------------------------|----|------|---|---------------------------|-----|
| Anz <sup>40</sup> | 2020 | int. 45, control 39 | int. 55.8 (SD 11.3), control 52.2 (SD 12.4) | Int. 40, control 44 | 12 mo | Autologous bone marrow aspirate concentrate | no | none | 1 | directly after harvesting | PRP |
|-------------------|------|---------------------|---------------------------------------------|---------------------|-------|---------------------------------------------|----|------|---|---------------------------|-----|

**Table 1: study characteristics.** Int = intervention group, mo = months, SD = standard deviation, MSC = mesenchymal stem cells, HA = hyaluronic acid, PRP = platelet-rich plasma, TKA = total knee arthroplasty, GFA = growth factor addition, BMC = bone marrow concentrate.

\* after 3 months all patients crossed over to intervention group and had a follow-up of 2 years. We included results after 3 months only.

| comparison                       | Outcome measures                                                                                                                                                                                                                      | No. of studies | Number of participants | Quality of evidence | Downgrading due to                                       |
|----------------------------------|---------------------------------------------------------------------------------------------------------------------------------------------------------------------------------------------------------------------------------------|----------------|------------------------|---------------------|----------------------------------------------------------|
|                                  | <u>functional outcomes</u>                                                                                                                                                                                                            |                |                        |                     |                                                          |
| BM- MSC vs. HA                   | Beneficial effect of MSC therapy on functional outcome scores (e.g. KOOS, WOMAC, Tegner, Lysholm) after 1, 2 and 4 years of follow-up and results were superior compared to HA therapy.                                               | 3              | 142                    | low                 | study limitations (1 level), imprecision (1 level)       |
| BM- MSC vs. saline               | Improvement of WOMAC (25 points (95% CI: 16-35)) 6 months after MSC therapy and no change in the saline group. Greater improvement in walking distance 6 months after MSC therapy compared to the saline group (mean 1151 vs. 127 m). | 1              | 43                     | very low            | study limitations (2 levels), imprecision (1 level)      |
| BM- MSC vs. exercise             | Change score after 3 months of follow-up (MSC vs. exercise): LEAS (+0.8 vs. -1.1 points (p=0.002)), KSS knee score (12.0 vs. 0.6 points (p<0.001)) and SF-12 (4.9 vs. 2.4 points (p=0.27)).                                           | 1              | 48                     | very low            | study limitations (2 levels), imprecision (1 level)      |
| BM- MSC vs. PRP                  | Improvement of WOMAC total after 1 year: mean 10.4-15.9 points after MSC therapy and mean 9.6-15.3 points after PRP.                                                                                                                  | 2              | 134                    | low to very low     | study limitations (1 or 2 levels), imprecision (1 level) |
| BM- MSC+PRP vs. BM- MSC          | Improvement of 24.0 points (BM- MSC) and 22.7 points (BM- MSC+PRP) on KOOS after 12 months (ns).                                                                                                                                      | 1              | 47                     | low                 | imprecision (2 levels)                                   |
| BM- MSC ± PRP vs. corticosteroid | Significant improvement in the BM- MSC ± PRP group (22.6 points) on KOOS after 12 months and a non-significant change after corticosteroid injection.                                                                                 | 1              | 47                     | low                 | imprecision (2 levels)                                   |

|                                          |                                                                                                                                                                                                                                                |   |     |          |                                                                              |
|------------------------------------------|------------------------------------------------------------------------------------------------------------------------------------------------------------------------------------------------------------------------------------------------|---|-----|----------|------------------------------------------------------------------------------|
| BM-MSc vs. BMC-MSc + allogenic cartilage | Lysholm score after 1 year: mean 27.6 points improvement in MSC group and mean 30.7 points in MSC + allogenic cartilage group. KOOS symptom improved with mean 24.8 and 31.9 points, respectively.                                             | 1 | 70  | very low | study limitations (1 level), imprecision (2 levels)                          |
| AD-MSc vs. PRP                           | Significant greater improvement of KOOS subscales pain and function after AD-MSc therapy compared to PRP (81 vs. 74 points (pain) and 82 vs. 75 points (function)) and non-significant change and difference on other KOOS subscales.          | 1 | 44  | very low | study limitations (1 level), imprecision (2 levels)                          |
| AD-MSc vs. saline                        | Mean reduction of WOMAC by 55% 6 months after MSC therapy. Significant improvement of KOOS on all subscales 6 months after MSC therapy (effect sizes not reported). No significant change in the saline group on WOMAC and all KOOS subscales. | 1 | 24  | low      | imprecision (2 levels)                                                       |
| AD-MSc vs. exercise                      | Improvement of global WOMAC by 24.4-32.9 points 12 months after MSC therapy and significant improvement of KOOS (effect sizes not reported). No changes in the exercise group.                                                                 | 1 | 30  | very low | study limitations (1 level), inconsistency (1 level), imprecision (2 levels) |
| AD-MSc v. HA                             | Both groups improved after 6 and 12 months on WOMAC and differences were not statistical significant different between groups.                                                                                                                 | 1 | 53  | low      | imprecision (2 levels)                                                       |
| PB-MSc vs. HA                            | Improvement of 137.2-166.5 points on WOMAC total 12 months after MSC therapy and 88.5 points in the HA group (p<0.001).                                                                                                                        | 1 | 60  | very low | study limitations (2 levels), imprecision (2 levels)                         |
|                                          | <u>pain (VAS)</u>                                                                                                                                                                                                                              |   |     |          |                                                                              |
| BM- MSc vs. HA                           | Median reduction of 4-5 points on VAS (0-10) after 1 year in the MSC group and median reduction of 1 point in the HA group. After 4 years of follow-up                                                                                         | 3 | 142 | low      | study limitations (1                                                         |

|                     |                                                                                                                         |   |    |          |                                                         |
|---------------------|-------------------------------------------------------------------------------------------------------------------------|---|----|----------|---------------------------------------------------------|
|                     | median reduction of 3-5 points in MSC group and increase of 2 points in HA group.                                       |   |    |          | level),<br>imprecision (1 level)                        |
| BM-MSC vs. saline   | No difference on VAS (0-100) after 6 months between both groups (mean change -20 points (MSC) vs. -15 points (saline)). | 1 | 43 | very low | study limitations (2 levels),<br>imprecision (1 level)  |
| BM-MSC vs. exercise | No difference on VAS between both groups: 3 month change score -8 (exercise) and -12.5 (MSC). (p=0.40)                  | 1 | 48 | very low | study limitations (2 levels),<br>imprecision (1 level)  |
| BM-MSC vs. PRP      | VAS after 1 year improved mean 1.8 points in MSC group and mean 0.5 points in PRP group.                                | 1 | 50 | very low | study limitations (2 levels),<br>imprecision (2 levels) |
| AD-MSC vs. PRP      | Mean improvement of 34.1 points on VAS (0-100) 2 years after MSC therapy and 29.2 points in PRP group (p<0.001).        | 1 | 44 | very low | study limitations (1 level),<br>imprecision (2 levels)  |
| AD-MSC vs. saline   | Mean improvement of 3.4 points on VAS (0-10) 6 months after MSC therapy and no change in saline group.                  | 1 | 24 | low      | imprecision (2 levels)                                  |
| AD-MSC vs. exercise | Mean improvement of 4.1-4.2 points on VAS (0-10) 12 months after MSC therapy. No changes in the exercise group.         | 1 | 30 | very low | study limitations (1 level),<br>imprecision (2 levels)  |

|                     |                                                                                                                                                                                                                                                                                                       |   |    |                                          |                                                                                          |
|---------------------|-------------------------------------------------------------------------------------------------------------------------------------------------------------------------------------------------------------------------------------------------------------------------------------------------------|---|----|------------------------------------------|------------------------------------------------------------------------------------------|
| AD-MSc v. HA        | Improvement of (respectively left and right knees) 4.29-4.40 points on VAS (0-10) 12 months after MSC therapy and 2.78-2.83 points in the HA group (p=0.0190 left knees and p=0.0178 right knees).                                                                                                    | 1 | 53 | very low                                 | study limitations (1 level), imprecision (2 levels)                                      |
|                     | <u>MRI outcomes</u>                                                                                                                                                                                                                                                                                   |   |    |                                          |                                                                                          |
| BM- MSC vs. HA      | Improvement of cartilage quality and volume (MOCART, WOMMS) 1 year after MSC therapy and no change after HA therapy.                                                                                                                                                                                  | 2 | 86 | low <sup>22</sup> very low <sup>30</sup> | study limitations (1 level, Wong et al.), inconsistency (1 level), imprecision (1 level) |
| BM-MSc vs. PRP      | No change after 1 year on MRI following the WOMMS protocol in both groups.                                                                                                                                                                                                                            | 1 | 50 | very low                                 | study limitations (1 level), imprecision (2 levels)                                      |
| AD-MSc vs. saline   | No difference in cartilage defect size 6 months after MSC therapy and increase of cartilage defect size in saline group.                                                                                                                                                                              | 1 | 24 | very low                                 | inconsistency (1 level), imprecision (2 levels)                                          |
| AD-MSc vs. exercise | Based on the 'articular cartilage pathology' subscale of the MOAKS, in the control group 33% of patients had no change after 12 months. In the intervention groups, no change of cartilage was scored in 70-78% and cartilage improvement in 0-11% of patients (one and two injections respectively). | 1 | 30 | very low                                 | study limitations (1 level), imprecision (2 levels)                                      |
| AD-MSc v. HA        | Improvement of cartilage volume of 108 ± 220 mm <sup>3</sup> (right knees) to 193 ± 282 mm <sup>3</sup> (left knees) 12 months after MSC therapy and no significant change in the HA group.                                                                                                           | 1 | 53 | very low                                 | study limitations (1 level), inconsistency                                               |



|  |  |  |  |  |                                         |
|--|--|--|--|--|-----------------------------------------|
|  |  |  |  |  | (1 level),<br>imprecision (2<br>levels) |
|--|--|--|--|--|-----------------------------------------|

**Table 2: GRADE assessment.** BM-MSc = bone marrow-derived mesenchymal stem cells; AD-MSc = adipose tissue-derived mesenchymal stem cells, PB-MSc = peripheral blood-derived mesenchymal stem cells; HA = hyaluronic acid; PRP = platelet-rich plasma, MOCART = Magnetic Resonance Observation of Cartilage Repair Tissue, KOOS = Knee Injury and Osteoarthritis Outcome Score, VAS = visual analogue scale, WOMAC = Western Ontario and McMaster Universities Osteoarthritis Index, WORMS = Whole-Organ Magnetic Resonance Imaging Score, KSS = Knee Society Score, MOAKS = MRI Osteoarthritis Knee Scores, LEAS = Lower Extremity Activity Scale, ns = not significant

| First author       | Year | Mean number of cells          | Main outcomes             | Timing of outcomes measured   | Intervention final FU score | Control final FU score | Mean difference | 95% CI          | P-value** | Adverse events              |
|--------------------|------|-------------------------------|---------------------------|-------------------------------|-----------------------------|------------------------|-----------------|-----------------|-----------|-----------------------------|
| Wong <sup>30</sup> | 2013 | 1,46 ± 0,29 x 10 <sup>7</sup> | IKDC scores               | 6 mo, 1 y, 2 y                | NA                          | NA                     | 7.65            | 3.04 to 12.26   | 0.001 I   | no serious adverse events   |
|                    |      |                               | Tegner score              |                               |                             |                        | 0.64            | 0.10 to 1.19    | 0.021 I   |                             |
|                    |      |                               | Lysholm score             |                               |                             |                        | 7.61            | 1.44 to 13.79   | 0.016 I   |                             |
|                    |      |                               | MOCART scoring system     | 1 y                           |                             |                        | 19.6            | 10.5 to 28.6    | < 0.001   |                             |
| Koh <sup>31</sup>  | 2014 | 4,11 x 10 <sup>6</sup>        | KOOS pain                 | last follow-up (mean 24.4 mo) | 81.2 ± 6.9                  | 74.0 ± 5.7             | 7.20*           | 3.76 to 10.64*  | < 0.001 I | adverse events not reported |
|                    |      |                               | KOOS symptom              |                               | 82.8 ± 7.2                  | 75.4 ± 8.5             | 7.40*           | 3.12 to 11.68*  | 0.006 I   |                             |
|                    |      |                               | KOOS sport and recreation |                               | NA                          | NA                     | NA              | NA              | NA        |                             |
|                    |      |                               | KOOS ADL                  |                               |                             |                        |                 |                 |           |                             |
|                    |      |                               | KOOS QOL                  |                               |                             |                        |                 |                 |           |                             |
|                    |      |                               | VAS pain (100 mm scale)   |                               | 10.2 ± 5.7                  | 16.2 ± 4.6             | -6.00*          | -8.82 to -3.18* | < 0.001 I |                             |

|                                       |               |                                                                      |                       |                                  |                                      |                                        |       |                 |                       |                                                                                                                                                                                                              |    |
|---------------------------------------|---------------|----------------------------------------------------------------------|-----------------------|----------------------------------|--------------------------------------|----------------------------------------|-------|-----------------|-----------------------|--------------------------------------------------------------------------------------------------------------------------------------------------------------------------------------------------------------|----|
|                                       |               |                                                                      | Lysholm score         |                                  | 84.7 ± 16.2                          | 80.6 ± 13.5                            | 4.10* | -4.01 to 12.21* | 0.357                 |                                                                                                                                                                                                              |    |
| <b>Lamo-Espinosa<sup>22, 44</sup></b> | 2016 and 2018 | 10 x 10 <sup>6</sup> (low-dose) or 100 x 10 <sup>6</sup> (high-dose) | VAS joint pain        | 12 mo                            | int. low-dose median 2 (IQR 1 to 3)  | median 4 (IQR 3 to 5)                  | NA    | NA              | NA                    | 12 mo: articular pain requiring anti-inflammatory treatment during the first 24 h after infiltration (int. high-dose 6, int. low-dose 3, control 1)<br><br>48 mo: no serious adverse events or complications |    |
|                                       |               |                                                                      |                       |                                  | int. high-dose median 2 (IQR 0 to 4) |                                        |       |                 | NA                    |                                                                                                                                                                                                              |    |
|                                       |               |                                                                      |                       | 48 mo                            | int. low-dose median 2 (IQR 2 to 5), | median 7 (IQR 6 to 7)                  |       |                 | 0.01                  |                                                                                                                                                                                                              |    |
|                                       |               |                                                                      |                       |                                  | int. high-dose median 3 (IQR 3 to 4) |                                        |       |                 | 0.004 I               |                                                                                                                                                                                                              |    |
|                                       |               |                                                                      |                       | Likert version of the WOMAC pain | 12 mo                                | int. low-dose median 3.5 (IQR 3 to 5)  |       |                 | median 2 (IQR 1 to 6) |                                                                                                                                                                                                              | NA |
|                                       |               |                                                                      |                       |                                  |                                      | int. high-dose median 2.5 (IQR 2 to 4) |       |                 |                       |                                                                                                                                                                                                              | NA |
|                                       |               |                                                                      | Likert version of the | 12 mo                            | int. low-dose median 2 (IQR 1 to 2), | median 2 (IQR 1 to 2)                  |       |                 | NA                    |                                                                                                                                                                                                              |    |

|  |  |  |                                               |                                         |                                           |                           |  |    |  |        |
|--|--|--|-----------------------------------------------|-----------------------------------------|-------------------------------------------|---------------------------|--|----|--|--------|
|  |  |  | WOMAC stiffness                               |                                         | int. high-dose median 2 (IQR 1 to 2)      |                           |  |    |  | NA     |
|  |  |  | Likert version of the WOMAC physical function | 12 mo                                   | Int. low-dose median 17 (IQR 10 to 20)    | median 9.5 (IQR 5 to 23)  |  |    |  | NA     |
|  |  |  |                                               |                                         | int. high-dose median 11 (IQR 9 to 14)    |                           |  | NA |  |        |
|  |  |  | Likert version of the WOMAC overall           | 12 mo                                   | int. low-dose median 21.5 (IQR 15 to 26)  | median 13.5 (IQR 8 to 33) |  |    |  | NA     |
|  |  |  |                                               |                                         | int. high-dose median 16.5 (IQR 12 to 19) |                           |  | NA |  |        |
|  |  |  |                                               | 48 mo                                   | int. low-dose median 17 (IQR 13 to 25.5)  | median 27 (IQR 17 to 30)  |  |    |  | 0.04 I |
|  |  |  |                                               | int high-dose median 16.5 (IQR 8 to 23) |                                           |                           |  |    |  |        |

|                              |      |                                                                                                              |                           |       |                                         |                          |    |    |                                                                 |                           |
|------------------------------|------|--------------------------------------------------------------------------------------------------------------|---------------------------|-------|-----------------------------------------|--------------------------|----|----|-----------------------------------------------------------------|---------------------------|
|                              |      |                                                                                                              | WORMS score               | 12 mo | int. low-dose median 90 (IQR 67 to 140) | median 83 (IQR 25 to 95) | NA | NA | NA                                                              |                           |
|                              |      |                                                                                                              |                           |       | int. high-dose median 53 (IQR 46 to 82) |                          |    |    |                                                                 |                           |
| <b>Goncars<sup>32</sup></b>  | 2017 | 38.64 ± 33.7 x 10 <sup>6</sup> (range 8.3 to 158.97 x 10 <sup>6</sup> )                                      | KOOS pain                 | 12 mo | 79.53                                   | 61.55                    | NA | NA | <0.05 I                                                         | no adverse events         |
|                              |      |                                                                                                              | KOOS symptom              |       | NA                                      | NA                       | NA | NA | ns                                                              |                           |
|                              |      |                                                                                                              | KOOS sport and recreation |       |                                         |                          |    |    |                                                                 |                           |
|                              |      |                                                                                                              | KOOS ADL                  |       |                                         |                          |    |    |                                                                 |                           |
|                              |      |                                                                                                              | KOOS QOL                  |       |                                         |                          |    |    |                                                                 |                           |
|                              |      |                                                                                                              | KOOS global score         |       |                                         |                          |    |    |                                                                 |                           |
|                              |      |                                                                                                              | KSS                       |       |                                         |                          |    |    |                                                                 |                           |
|                              |      |                                                                                                              | KSS function              |       |                                         |                          |    |    |                                                                 |                           |
| <b>Turajane<sup>33</sup></b> | 2017 | with GFA: 1143, 1264, 1276 x 10 <sup>3</sup> per 3 ml, without GFA: 1095, 1252, 1253 x 10 <sup>3</sup> per 3 | WOMAC pain                | 12 mo | with GFA: 28, without GFA: 30           | 57                       | NA | NA | int. with GFA vs. control 0.003 I, int. without GFA vs. control | no notable adverse events |

|  |  |                                                                        |                               |  |                                     |       |  |                                                                                                                                              |
|--|--|------------------------------------------------------------------------|-------------------------------|--|-------------------------------------|-------|--|----------------------------------------------------------------------------------------------------------------------------------------------|
|  |  | ml (1 <sup>st</sup> , 2 <sup>nd</sup><br>and 3 <sup>rd</sup><br>resp.) |                               |  |                                     |       |  | 0.003 I,<br>int.<br>pooled vs.<br>control<br>0.004 I                                                                                         |
|  |  |                                                                        | WOMAC<br>stiffness            |  | with GFA: 9,<br>without GFA:<br>20  | 31.5  |  | int. with<br>GFA vs.<br>control<br>0.0001 I,<br>int.<br>without<br>GFA vs.<br>control<br>0.053, int.<br>pooled vs.<br>control<br>0.0001 I    |
|  |  |                                                                        | WOMAC<br>physical<br>function |  | with GFA:<br>15, without<br>GFA: 25 | 38.8  |  | int. with<br>GFA vs.<br>control<br>0.001 I,<br>int.<br>without<br>GFA vs.<br>control<br>0.003 I,<br>int.<br>pooled vs.<br>control<br>0.001 I |
|  |  |                                                                        | WOMAC<br>overall              |  | with GFA:<br>52, without<br>GFA: 75 | 126.8 |  | int. with<br>GFA vs.<br>control <<br>0.001 I,<br>int.<br>without                                                                             |

|                               |      |                      |                 |      |                            |                            |        |                |                                                              |                                                          |
|-------------------------------|------|----------------------|-----------------|------|----------------------------|----------------------------|--------|----------------|--------------------------------------------------------------|----------------------------------------------------------|
|                               |      |                      |                 |      |                            |                            |        |                | GFA vs. control < 0.001 I, int. pooled vs. control < 0.001 I |                                                          |
| <b>Emadedin</b> <sup>34</sup> | 2018 | 40 x 10 <sup>6</sup> | VAS             | 6 mo | NA                         | NA                         | NA     | NA             | 0.65                                                         | 22 AE (all grade 1-3, no serious AEs)                    |
|                               |      |                      | WOMAC total     |      | NA                         |                            |        |                | 0.01 I                                                       |                                                          |
|                               |      |                      | WOMAC pain      |      | mean 13.1 ± 18.1           |                            |        |                | 0.001 I                                                      |                                                          |
|                               |      |                      | WOMAC stiffness |      | NA                         |                            |        |                | 0.40                                                         |                                                          |
|                               |      |                      | WOMAC function  |      |                            |                            |        |                | 0.04 I                                                       |                                                          |
|                               |      |                      | MCII pain       |      |                            |                            |        |                | 0.44                                                         |                                                          |
|                               |      |                      | MCII function   |      |                            |                            |        |                | 0.18                                                         |                                                          |
|                               |      |                      | PASS pain       |      |                            |                            |        |                | 0.46                                                         |                                                          |
|                               |      |                      | PASS function   |      |                            |                            |        |                | 0.06                                                         |                                                          |
| <b>Centeno</b> <sup>35</sup>  | 2018 | NA                   | VAS             | 3 mo | 2.7 (SD 2.1) <sup>#</sup>  | 3.8 (SD 2) <sup>#</sup>    | -1.10* | -2.29 to 0.09* | 0.40                                                         | no serious adverse events reported; 16 patients reported |
|                               |      |                      | LEAS            |      | 13.5 (SD 2.2) <sup>#</sup> | 11.6 (SD 2.8) <sup>#</sup> | 1.90*  | 0.44 to 3.36*  | 0.002 I                                                      |                                                          |

|                          |      |                     |                      |      |                              |                             |        |                 |          |                                                            |
|--------------------------|------|---------------------|----------------------|------|------------------------------|-----------------------------|--------|-----------------|----------|------------------------------------------------------------|
|                          |      |                     | KSS knee score       |      | 87.7 (SD 10.5) <sup>#</sup>  | 76.6 (SD 9.4) <sup>#</sup>  | 11.10* | 5.28 to 16.92*  | <0.001 I | knee pain after treatment                                  |
|                          |      |                     | KSS function score   |      | 91.9 (SD 12.4) <sup>#</sup>  | 85.5 (SD 11.8) <sup>#</sup> | 6.40*  | -1.42 to 14.22* | 0.17     |                                                            |
|                          |      |                     | SF-12 physical       |      | 44.5 (SD 10.3) <sup>#</sup>  | 38.6 (SD 8.9) <sup>#</sup>  | 5.90*  | 0.35 to 11.45*  | 0.27     |                                                            |
|                          |      |                     | SF-12 mental         |      | 55.9 (SD 6.7) <sup>#</sup>   | 57.4 (SD 7.5) <sup>#</sup>  | -1.50* | -5.62 to 2.62*  | 0.68     |                                                            |
|                          |      |                     | Knee range of motion |      | 133.5 (SD 10.6) <sup>#</sup> | 13.8 (SD 6.5) <sup>#</sup>  | 1.70*  | -3.41 to 6.81*  | NA       |                                                            |
| <b>Lee</b> <sup>36</sup> | 2018 | 1 x 10 <sup>8</sup> | WOMAC total          | 6 mo | 26.7 ± 13.3                  | NA                          | NA     | NA              | NA       | int: 10 (83 %) patients; control: 7 (58 %). All grade 1-3. |
|                          |      |                     | WOMAC pain           |      | NA                           |                             |        |                 |          |                                                            |
|                          |      |                     | WOMAC stiffness      |      |                              |                             |        |                 |          |                                                            |
|                          |      |                     | WOMAC function       |      |                              |                             |        |                 |          |                                                            |
|                          |      |                     | VAS pain             |      | 3.4 ± 1.5                    |                             |        |                 |          |                                                            |
|                          |      |                     | KOOS pain            |      | NA                           |                             |        |                 |          |                                                            |
|                          |      |                     | KOOS symptom         |      |                              |                             |        |                 |          |                                                            |
|                          |      |                     | KOOS ADL             |      |                              |                             |        |                 |          |                                                            |
|                          |      |                     | KOOS sport           |      |                              |                             |        |                 |          |                                                            |



|                             |      |                      |                              |       |                                 |                                 |         |                  |                  |                             |                  |
|-----------------------------|------|----------------------|------------------------------|-------|---------------------------------|---------------------------------|---------|------------------|------------------|-----------------------------|------------------|
|                             |      |                      | KOOS QOL                     |       |                                 |                                 |         |                  |                  |                             |                  |
|                             |      |                      | MRI size of cartilage defect |       | 314.86 mm <sup>2</sup> ± 267.33 | 355.61 mm <sup>2</sup> ± 258.54 | -40.75* | -251 to 169*     | 0.0051           |                             |                  |
| <b>Bastos</b> <sup>25</sup> | 2020 | 40 x 10 <sup>6</sup> | KOOS global                  | 12 mo | MSC: mean 54.2 ± 24.7           | mean 54.4 ± 22.7                | -0.20*  | -16.41 to 16.01* | NA               | adverse events not reported |                  |
|                             |      |                      |                              |       | MSC+PRP: mean 59.9 ± 24.8       |                                 | 5.50*   |                  |                  |                             | -11.39 to 22.39* |
|                             |      |                      |                              |       | MSC vs. MSC+PRP                 |                                 | -5.70*  |                  |                  |                             | -23.45 to 12.05* |
|                             |      |                      | KOOS symptom                 | 12 mo | MSC: mean 61.6 ± 22.5           | mean 56.1 ± 22.3                | 5.50*   | -9.76 to 20.76*  |                  |                             |                  |
|                             |      |                      |                              |       | MSC+PRP: mean 60.5 ± 17.6       |                                 | 4.40*   |                  | -9.65 to 18.45*  |                             |                  |
|                             |      |                      |                              |       | MSC vs. MSC+PRP                 |                                 | 1.10*   |                  | -13.27 to 15.47* |                             |                  |
|                             |      |                      | KOOS pain                    | 12 mo | MSC: mean 56.8 ± 26.5           | mean 59.5 ± 22.2                | -2.70*  | -19.43 to 14.03* |                  |                             |                  |

|  |  |  |                  |                                 |                           |                        |                     |                     |  |
|--|--|--|------------------|---------------------------------|---------------------------|------------------------|---------------------|---------------------|--|
|  |  |  |                  | MSC+PRP:<br>mean 65.5 ±<br>26.3 |                           | 6.00*                  | -11.35 to<br>23.35* |                     |  |
|  |  |  |                  | MSC vs.<br>MSC+PRP              |                           | -8.70*                 | -27.63 to<br>10.23* |                     |  |
|  |  |  | KOOS<br>function | 12 mo                           | MSC: mean<br>58.4 ± 27.5, | mean<br>61.6 ±<br>24.4 | -3.20*              | -20.98 to<br>14.58* |  |
|  |  |  |                  | MSC+PRP:<br>mean 66.3 ±<br>27.4 | 4.70*                     |                        | -13.75 to<br>23.15* |                     |  |
|  |  |  |                  | MSC vs.<br>MSC+PRP              | -7.90*                    |                        | -27.59 to<br>11.79* |                     |  |
|  |  |  | KOOS sport       | 12 mo                           | MSC: mean<br>36.6 ± 29.5  | mean<br>36.2 ±<br>29.5 | 0.40*               | -19.74 to<br>20.54* |  |
|  |  |  |                  | MSC+PRP:<br>mean 47.1 ±<br>34.5 | 10.90*                    |                        | -11.97 to<br>33.77* |                     |  |
|  |  |  |                  | MSC vs.<br>MSC+PRP              | -10.50*                   |                        | -33.01 to<br>12.01* |                     |  |
|  |  |  | KOOS QOL         | 12 mo                           | MSC: mean<br>40.2 ± 25.9  | mean<br>32.0 ±<br>29.3 | 8.20*               | -10.64 to<br>27.04* |  |
|  |  |  |                  | MSC+PRP:<br>mean 35.7 ±<br>25.6 | 3.70*                     |                        | -15.63 to<br>23.03* |                     |  |
|  |  |  |                  | MSC vs.<br>MSC+PRP              | 4.50*                     |                        | -13.96 to<br>22.96* |                     |  |

|                       |      |                       |              |                                       |                                    |                   |                 |                 |       |                                                                                                                                                                               |
|-----------------------|------|-----------------------|--------------|---------------------------------------|------------------------------------|-------------------|-----------------|-----------------|-------|-------------------------------------------------------------------------------------------------------------------------------------------------------------------------------|
| Freitag <sup>37</sup> | 2019 | 100 x 10 <sup>6</sup> | NPRS         | 12 mo                                 | int 1 injection: mean 2.6 (SD 1.8) | mean 6.1 (SD 2.6) | -3.50*          | -5.46 to -1.54* | .00 I | no serious adverse events. Int 1 injection group 6 (60%) patients had mild AE and in 2 injections group 50% had mild AE after first injection and 40% after second injection. |
|                       |      |                       |              |                                       | int 2 injections: mean 2.3 (SD 2)  |                   | -3.80*          | -5.83 to -1.77* | .00 I |                                                                                                                                                                               |
|                       |      |                       |              |                                       | 1 vs 2 injections                  |                   | 0.30*           | -1.37 to 1.97*  | ns    |                                                                                                                                                                               |
|                       |      |                       | KOOS pain    | int 1 injection: mean 77.3 (SD 11.3)  | mean 48.9 (SD 12.7)                | 28.40*            | 17.86 to 38.94* | .03 I           |       |                                                                                                                                                                               |
|                       |      |                       |              | int 2 injections: mean 80.5 (SD 10.7) |                                    | 31.60*            | 21.31 to 41.89* | .02 I           |       |                                                                                                                                                                               |
|                       |      |                       |              | 1 vs 2 injections                     |                                    | -3.20*            | -12.85 to 6.45* | ns              |       |                                                                                                                                                                               |
|                       |      |                       | KOOS symptom | int 1 injection: mean 82.6 (SD 14.1)  | mean 47.9 (SD 13.6)                | 34.70*            | 22.56 to 46.84* | .00 I           |       |                                                                                                                                                                               |
|                       |      |                       |              | int 2 injections:                     |                                    | 30.20*            | 18.41 to 41.99* | .00 I           |       |                                                                                                                                                                               |

|  |  |  |            |                                                 |                           |        |                     |  |        |
|--|--|--|------------|-------------------------------------------------|---------------------------|--------|---------------------|--|--------|
|  |  |  |            | mean 78.1<br>(SD 13.3)                          |                           |        |                     |  |        |
|  |  |  |            | 1 vs 2<br>injections                            |                           | 4.50*  | -7.51 to<br>16.51*  |  | ns     |
|  |  |  | KOOS ADL   | int 1<br>injection:<br>mean 84.3<br>(SD 9.4)    | mean<br>60.7 (SD<br>13.5) | 23.60* | 14.23 to<br>32.97*  |  | .025 I |
|  |  |  |            | int 2<br>injections:<br>mean 88.8<br>(SD 8.4)   |                           | 28.10* | 18.25 to<br>37.95*  |  | .017 I |
|  |  |  |            | 1 vs 2<br>injections                            |                           | -4.50* | -12.31 to<br>3.31*  |  | ns     |
|  |  |  | KOOS sport | int 1<br>injection:<br>mean 67.8<br>(SD 17.5)   | mean<br>31.5 (SD<br>33)   | 36.30* | 13.15 to<br>59.45*  |  | .00 I  |
|  |  |  |            | int 2<br>injections:<br>mean SD 70<br>(SD 17.8) |                           | 38.50* | 15.26 to<br>61.74*  |  | .00 I  |
|  |  |  |            | 1 vs 2<br>injections                            |                           | -2.20* | -17.67 to<br>13.27* |  | ns     |
|  |  |  | KOOS QOL   | int 1<br>injection:<br>mean 61.8<br>(SD 13)     | mean<br>33.9 (SD<br>18.9) | 27.90* | 13.68 to<br>42.12*  |  | .003 I |

|                  |      |                     |                      |       |                                     |                     |         |                  |        |                                                                                                                                                                                                                 |
|------------------|------|---------------------|----------------------|-------|-------------------------------------|---------------------|---------|------------------|--------|-----------------------------------------------------------------------------------------------------------------------------------------------------------------------------------------------------------------|
|                  |      |                     |                      |       | int 2 injections: mean 56.3 (SD 18) |                     | 22.40*  | 6.22 to 38.58*   | .006   |                                                                                                                                                                                                                 |
|                  |      |                     |                      |       | 1 vs 2 injections                   |                     | 5.50*   | -8.26 to 19.26*  | ns     |                                                                                                                                                                                                                 |
|                  |      |                     | WOMAC                |       | int 1 injection: mean 84 (SD 9.4)   | mean 59.1 (SD 12.8) | 24.90*  | 15.06 to 34.74*  | .00    |                                                                                                                                                                                                                 |
|                  |      |                     |                      |       | int 2 injections: 87.3 (SD 8)       |                     | 28.20*  | 18.84 to 37.56*  | .00    |                                                                                                                                                                                                                 |
|                  |      |                     |                      |       | 1 vs 2 injections                   |                     | -3.30*  | -10.95 to 4.35*  | ns     |                                                                                                                                                                                                                 |
|                  |      |                     | MOAKS                |       | NA                                  | NA                  | NA      | NA               | NA     |                                                                                                                                                                                                                 |
| Lu <sup>26</sup> | 2019 | 5 x 10 <sup>7</sup> | WOMAC                | 12 mo | 21.35 ± 18.19                       | 27.25 ± 16.33       | -5.90*  | -15.30 to 3.50*  | NA     | int. 19 patients (73.07%) mild to moderate adverse events, 0 severe adverse events. Control 14 patients (53.85%) mild to moderate adverse events. 1 (3.8%) severe adverse event (infection) (in control group). |
|                  |      |                     | VAS                  |       | NA                                  | NA                  | NA      | NA               | < 0.05 |                                                                                                                                                                                                                 |
|                  |      |                     | SF-36                |       | 71.96 ± 12.79                       | 83.13 ± 15.59       | -11.17* | -18.92 to -3.42* | 0.0097 |                                                                                                                                                                                                                 |
|                  |      |                     | MRI cartilage repair |       | NA                                  | NA                  | NA      | NA               | NA     |                                                                                                                                                                                                                 |

|                                   |      |                     |                           |                               |                                              |                           |    |    |         |                                                                                                                          |
|-----------------------------------|------|---------------------|---------------------------|-------------------------------|----------------------------------------------|---------------------------|----|----|---------|--------------------------------------------------------------------------------------------------------------------------|
| <b>Lamo-Espinosa<sup>38</sup></b> | 2020 | 100x10 <sup>6</sup> | VAS                       | 12 mo                         | 3.5 ± 2.5                                    | 4.5 ± 2.2                 | NA | NA | NA      | articular pain during the first 24 h after infiltration (int. 6, control 0). No serious adverse events or complications. |
|                                   |      |                     | WOMAC pain                |                               | 4.1 ± 3.6                                    | 4.5 ± 3.2                 | NA | NA | NA      |                                                                                                                          |
|                                   |      |                     | WOMAC stiffness           |                               | 2.1 ± 1.9                                    | 2.1 ± 1.6                 | NA | NA | NA      |                                                                                                                          |
|                                   |      |                     | WOMAC physical function   |                               | 16.7 ± 11.6                                  | 15.5 ± 11.9               | NA | NA | NA      |                                                                                                                          |
|                                   |      |                     | WOMAC total               |                               | 23.0 ± 16.6                                  | 22.3 ± 15.8               | NA | NA | NA      |                                                                                                                          |
|                                   |      |                     | knee joint space on X-ray |                               | median 1.41 mm (IQR 1.96)                    | median 1.77 mm (IQR 1.97) | NA | NA | NA      |                                                                                                                          |
|                                   |      |                     | WORMS (MRI)               |                               | median 79.8 (SD 29.1)                        | median 77.5 (SD 31.5)     | NA | NA | NA      |                                                                                                                          |
| <b>Kim<sup>39</sup></b>           | 2020 | 4,7x10 <sup>6</sup> | Lysholm score             | mean 27.6 mo (range 24-36 mo) | MSC+ allogenic cartilage mean 89.3 (SD 16.1) | MSC: mean 85.4 (SD 15.9)  | NA | NA | 0.002 I | No major adverse events                                                                                                  |
|                                   |      |                     | KOOS pain                 |                               | MSC+allogenic cartilage mean 75.6 (SD 12.8)  | MSC: mean 70.4 (SD 13.2)  | NA | NA | 0.041 I |                                                                                                                          |

|                         |      |    |                               |       |                                             |                          |    |    |           |              |
|-------------------------|------|----|-------------------------------|-------|---------------------------------------------|--------------------------|----|----|-----------|--------------|
|                         |      |    |                               |       |                                             |                          |    |    |           |              |
|                         |      |    | KOOS symptom                  |       | MSC+allogenic cartilage mean 73.6 (SD 17.8) | MSC: mean 67.3 (SD 17.2) | NA | NA | < 0.001 I |              |
|                         |      |    | KOOS activities of daily life |       | MSC+allogenic cartilage mean 76.2 (SD 17.2) | MSC: mean 70.3 (SD 16.7) | NA | NA | 0.0017 I  |              |
|                         |      |    | KOOS sports and recreation    |       | MSC+allogenic cartilage mean 53.2 (SD 22.1) | MSC: mean 48.6 (SD 18.8) | NA | NA | < 0.001 I |              |
|                         |      |    | KOOS quality of life          |       | MSC+allogenic cartilage mean 62.3 (SD 23.1) | MSC: mean 52.1 (SD 20.3) | NA | NA | 0.009 I   |              |
| <b>Anz<sup>40</sup></b> | 2020 | NA | IKDC score                    | 12 mo | mean 64.3 (SD 20.8)                         | mean 63.7 (SD 19.6)      | NA | NA | NA        | Not reported |
|                         |      |    | WOMAC total                   |       | mean 19.4 (SD 16.2)                         | mean 16.8 (SD 16.9)      | NA | NA | NA        |              |

|  |  |  |                 |  |                        |                        |    |    |    |  |
|--|--|--|-----------------|--|------------------------|------------------------|----|----|----|--|
|  |  |  | WOMAC pain      |  | mean 3.5<br>(SD 3.1)   | mean 2.9<br>(SD 3.1)   | NA | NA | NA |  |
|  |  |  | WOMAC stiffness |  | mean 2.3<br>(SD 1.6)   | mean 1.8<br>(SD 1.5)   | NA | NA | NA |  |
|  |  |  | WOMAC function  |  | mean 12.8<br>(SD 11.6) | mean 11.3<br>(SD 12.2) | NA | NA | NA |  |

**Table 3: study outcomes.** NA= not applicable, ns= not significant, mo= months, y = years, FU = follow-up, MSC = mesenchymal stem cells,

PRP = platelet-rich plasma, NPRS = numeric pain rating scale, MOAKS = MRI Osteoarthritis Knee Scores, CI = confident interval, IKDC = International Knee Documentation Committee, MOCART = Magnetic Resonance Observation of Cartilage Repair Tissue, KOOS = Knee Injury and Osteoarthritis Outcome Score, ADL = activities of daily living, QOL = quality of life, VAS = visual analogue scale, IQR = interquartile range, WOMAC = Western Ontario and McMaster Universities Osteoarthritis Index, WORMS = Whole-Organ Magnetic Resonance Imaging Score, KSS = Knee Society Score, GFA = growth factor addition, MCII = Minimum Clinically Important Improvement, PASS = Patient Acceptable Symptom State, LEAS = Lower Extremity Activity Scale, SF-12 = Short Form-12 scales, SF-36 = Short Form-36 scales, CFU = colony forming units.

\* Calculated using RevMan V5.4.1; *Review Manager (RevMan) [Computer program]. Version 5.4, The Cochrane Collaboration, 2020.*

\*\* I indicates the intervention group showed significant improvement compared with controls, while C indicates the control group showed significant improvements compared to the intervention group

# obtained from trial authors
